# Supplementary material for: Randomized Feasibility Trial of a Low Tidal Volume-Airway Pressure Release Ventilation Protocol Compared With Traditional Airway Pressure Release Ventilation and Volume Control Ventilation Protocols
Source: PubMed Central journal article supplement — Crit Care Med. 2018 Nov 16;46(12):1943–52. doi: 10.1097/CCM.0000000000003437 (PMC6250244; doi:10.1097/ccm.0000000000003437), 2018-11-16
Supplement: ccm-46-01943-s001.pdf [file ccm-46-01943-s001.pdf]

# APRV – LTV STUDY METARULES

Goal: Maintain a mean airway pressure that recruits and maintains end expiratory lung volume. Also follow release volumes and keep release volumes between 4-8cc/kg with target 6.0cc/kg

- All patients should have an ABG at the time of randomization and generally every 2 hours unless contraindicated
- Protocol will be run within 30 minutes of new ABG's
- Use PaO<sub>2</sub> if available, only use SPO<sub>2</sub> if PaO<sub>2</sub> more than 30 minutes old.
- Paper and computer charting must be done every two hours and whenever a change is made. When the patient is taken off the protocol, the paper charting will be turned in to a member of the research team.
- Treat correctable problems before failing patient or reassessing:
  1. Anxiety, pain, delirium
  2. Acute bronchospasm
  3. Mucus plug
  4. Excessive sedation
  5. Patient position
  6. Ventilator circuit problem
- Contact the attending MD or house officer when the following conditions occur:
  1. P high has been increased 6 cmH<sub>2</sub>O
  2. P high at 28 cm H<sub>2</sub>O.
  3. FiO<sub>2</sub> increased 30 %.
  4. P Low and P high are closer than 5mmHg apart
- % of peak expiratory flow will be maintained at 50 to 75 %. T low will be adjusted to maintain the % of peak expiratory flow at 50 to 75%.
- Slope is set at "0" to ensure a square waveform.
- ATC will be off until mode is CPAP.
- P low will be titrated to target release volumes
- If P high is being decreased for oxygenation P low will decrease generally by same amount
- P high will not be increased or decreased by more than 4 cm H<sub>2</sub>O every two hours
- T high will not be increased or decreased by more than 2 seconds every two hours.
- If the patient is being paralyzed, change the mode to PRVC, use the procedure APRV to Assist Control Transition
- If the pH > 7.25 and < 7.40
  - And PCO<sub>2</sub> > 35 follow the protocol
  - And PCO<sub>2</sub> is 25 – 35, contact MD
- ABG recommended:
  - When ABG SpO<sub>2</sub> and SaO<sub>2</sub> differ by more than 5.
  - Significant change in temperature or minute volume shifting the O<sub>2</sub> dissociation curve.
- ABG required:

- Increase or decrease T high by a total of 5 seconds.
- 6 hours if ABG SpO2 and SaO2 differ by 6.
- 6 hours when P high  $\geq 25$  and FiO2  $>0.6$
- 12 hours when FiO2  $> .4$  and P High  $\geq 15$
- 24 hours when FiO2 =  $.4$  and P High  $\leq 10$ .

### Flow Waveform Interpretation Guide

| Waveform                                                                                                                 | Interpretation / Definition                                                                                                                                                                                                                                                        |
|--------------------------------------------------------------------------------------------------------------------------|------------------------------------------------------------------------------------------------------------------------------------------------------------------------------------------------------------------------------------------------------------------------------------|
| <b>0.</b><br><b>Sinusoidal</b><br>      | Normal flow waveform where the inspiratory flow is semi - elliptical, or a half-moon shape. Generally, the base of the waveform is wider than the amplitude. Peak flows usually remain $< 40$ Lpm. Sinusoidal waveforms indicate <b>good recruitment with minimal elastic WOB.</b> |
| <b>1.</b><br><b>Whale's Tooth</b><br>   | Round at the top and the amplitude is usually greater than the width of the base. Minimal tapering is observed from the bottom to the top of the inspiratory waveform. Peak flow usually remains $< 50 - 60$ LPM. Suggests <b>mild to moderate elastic WOB.</b>                    |
| <b>2.</b><br><b>Shark's Tooth</b><br>  | Triangular in shape where the amplitude of the waveform somewhat exceeds the width of the base. Peak flows usually $< 70$ LPM. Suggests <b>moderate to substantial elastic WOB.</b>                                                                                                |
| <b>3.</b><br><b>Canine Spiked</b><br> | Tall narrow waveforms with significant tapering from bottom to top. Peak Flows usually $> 70$ LPM. Suggests <b>severe elastic WOB.</b>                                                                                                                                             |

# APRV LTV Protocol

## F101. CORE

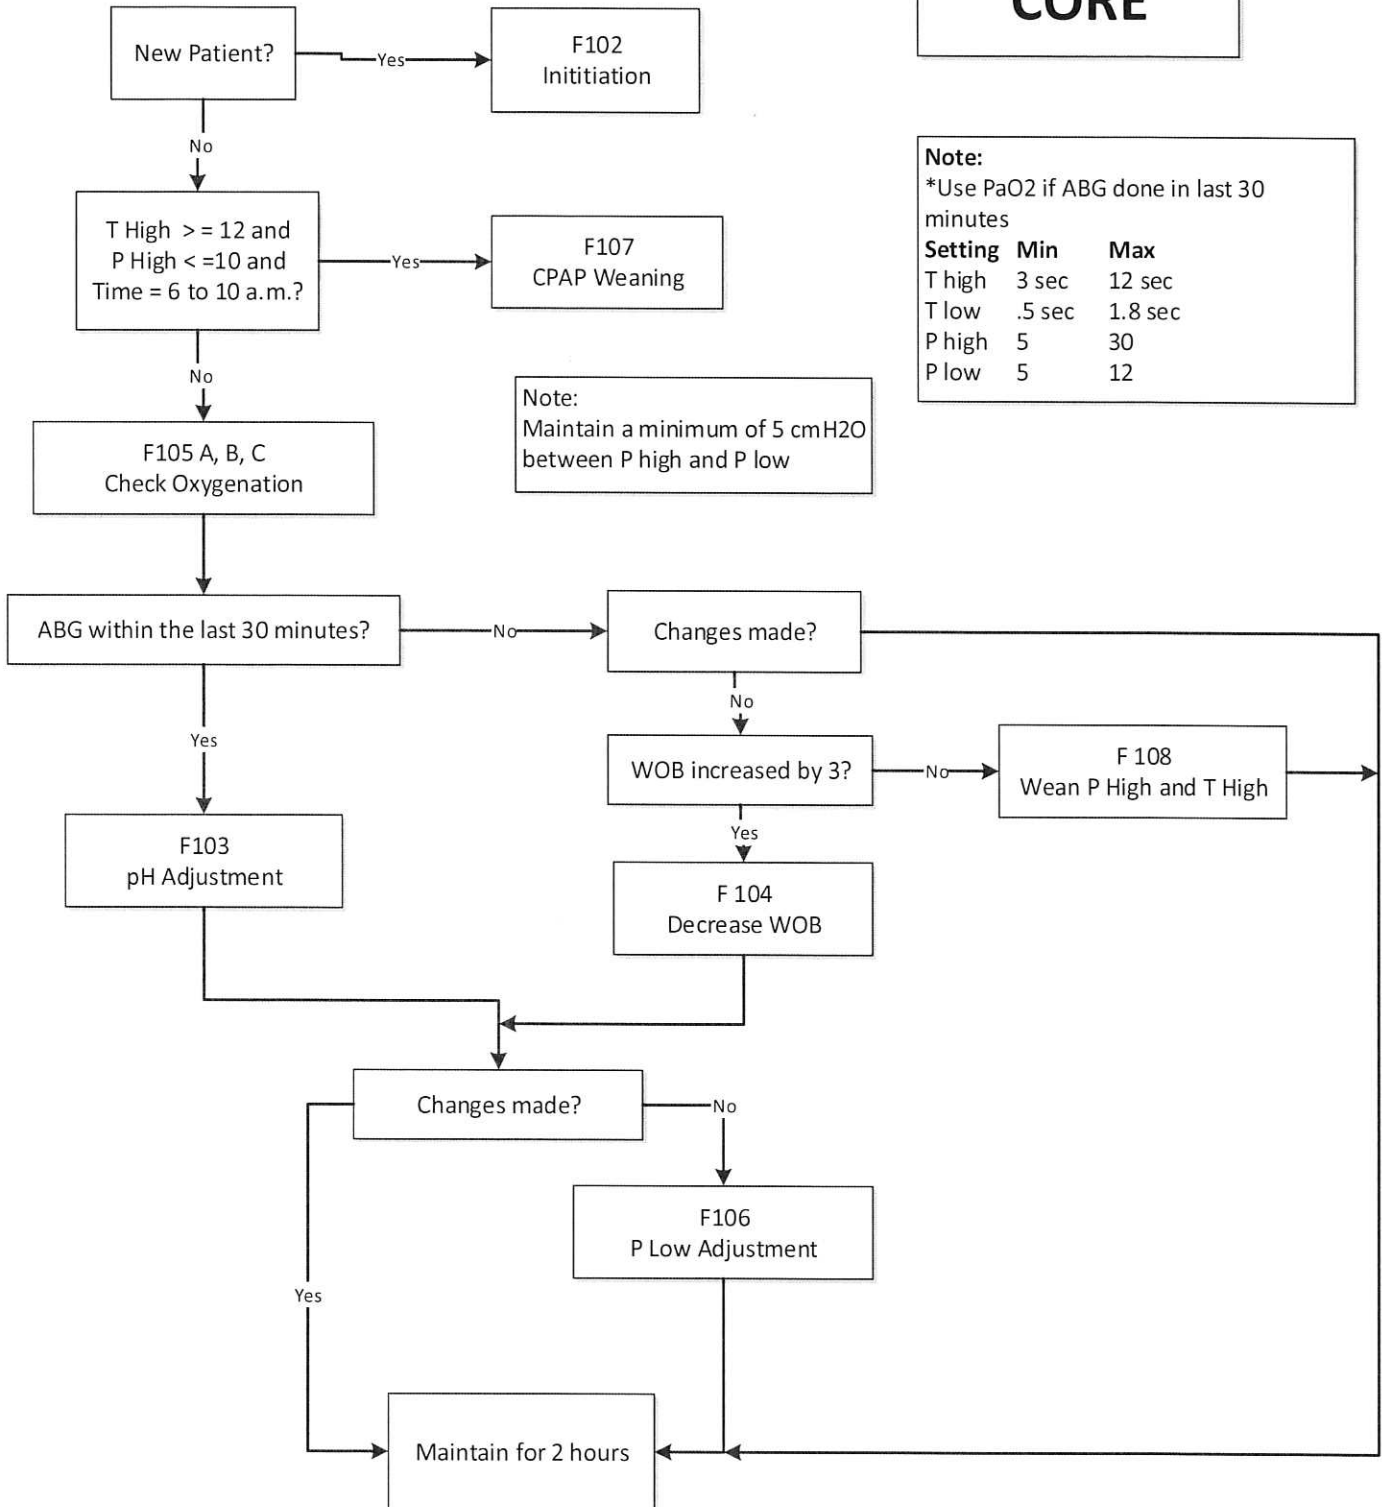

**Note:**  
\*Use PaO<sub>2</sub> if ABG done in last 30 minutes

| Setting | Min    | Max     |
|---------|--------|---------|
| T high  | 3 sec  | 12 sec  |
| T low   | .5 sec | 1.8 sec |
| P high  | 5      | 30      |
| P low   | 5      | 12      |

**Note:**  
Maintain a minimum of 5 cmH<sub>2</sub>O between P high and P low

**Legend**  
CORE: Map to titration of protocol, guide to individual flows  
F followed by a number: Flows  
S followed by a number: States, decisions  
A followed by a number: conditions  
Above used to enhance communication/ prepare for computerization  
LTV: Low Tidal Volume

# APRV LTV Protocol

## 102. Initial APRV Settings

**Note:**

Maintain a minimum of 5 cmH2O between P high and P low.

| Setting | Min    | Max     |
|---------|--------|---------|
| T high  | 3 sec  | 12 sec  |
| T low   | .5 sec | 1.8 sec |
| P high  | 5      | 30      |
| P low   | 5      | 12      |

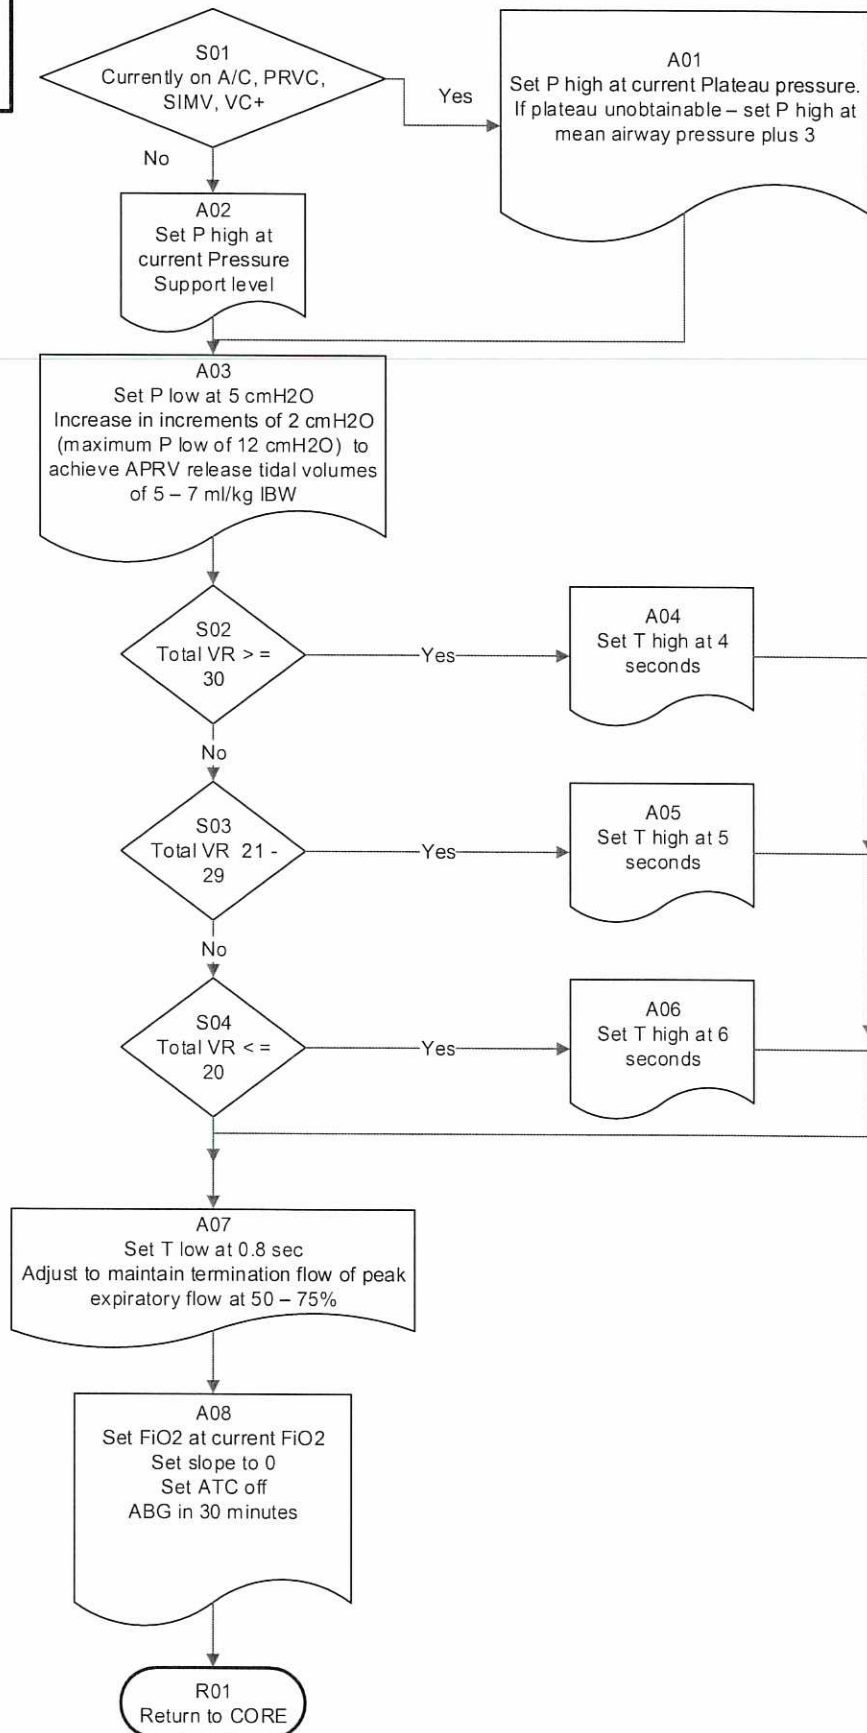

# APRV LTV Protocol Ventilation Cells

## F103. pH Adjustment

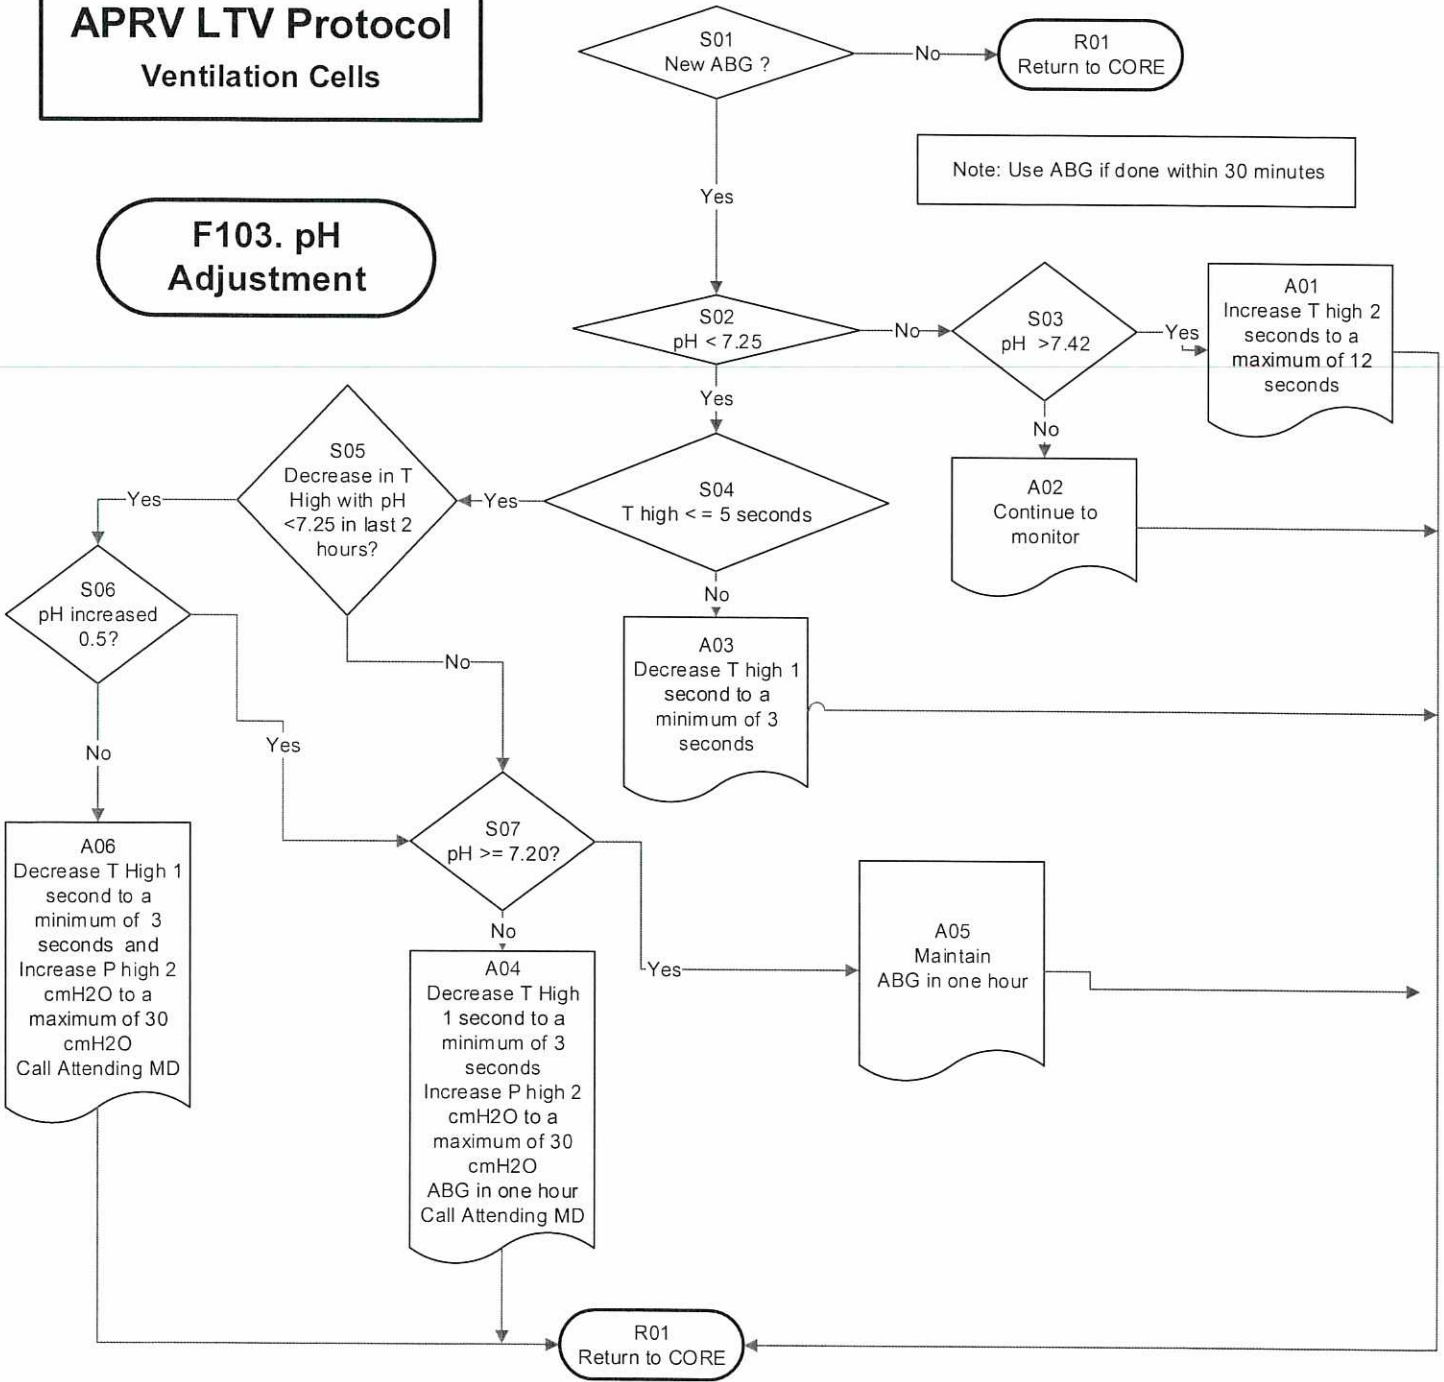

Note: Use ABG if done within 30 minutes

| Setting | Min    | Max     |
|---------|--------|---------|
| T high  | 3 sec  | 12 sec  |
| T low   | .5 sec | 1.8 sec |
| P high  | 5      | 30      |
| P low   | 5      | 12      |

**Note:**  
\*Maintain a minimum of 5 cmH2O between P high and P low.

**NOTE**  
If the pH is between 7.25 and 7.40:  
\* PCO2 > 35 follow the protocol  
\* PCO2 25 – 35, contact MD

# APRV LTV

## F104. Work of Breathing Assessment

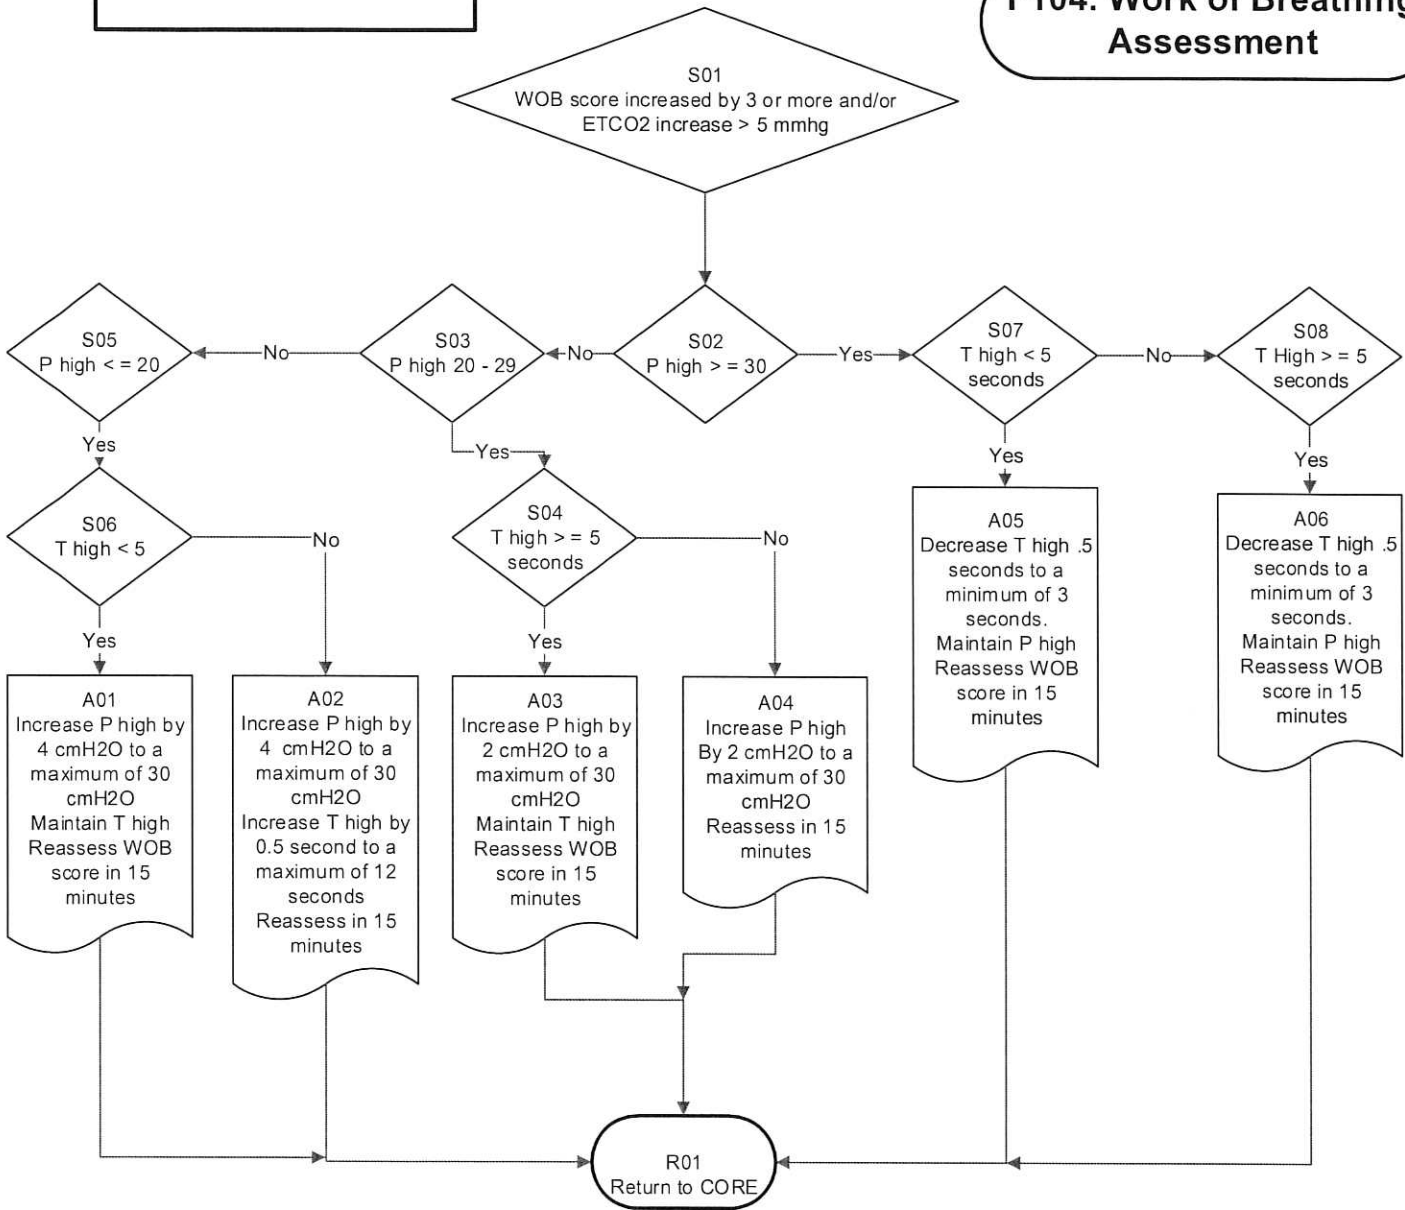

**Note:**

- \*Do not increase or decrease P high by more than 4 cm H2O every 2 hours.
- \*Do not increase or decrease T high by more than 2 seconds every 2 hours.
- \*Maintain a minimum of 5 cmH2O between P high and P low.

| Setting | Min    | Max     |
|---------|--------|---------|
| T high  | 3 sec  | 12 sec  |
| T low   | .5 sec | 1.8 sec |
| P high  | 10     | 30      |
| P low   | 5      | 12      |









# APRV LTV

## F106. P Low Adjustment

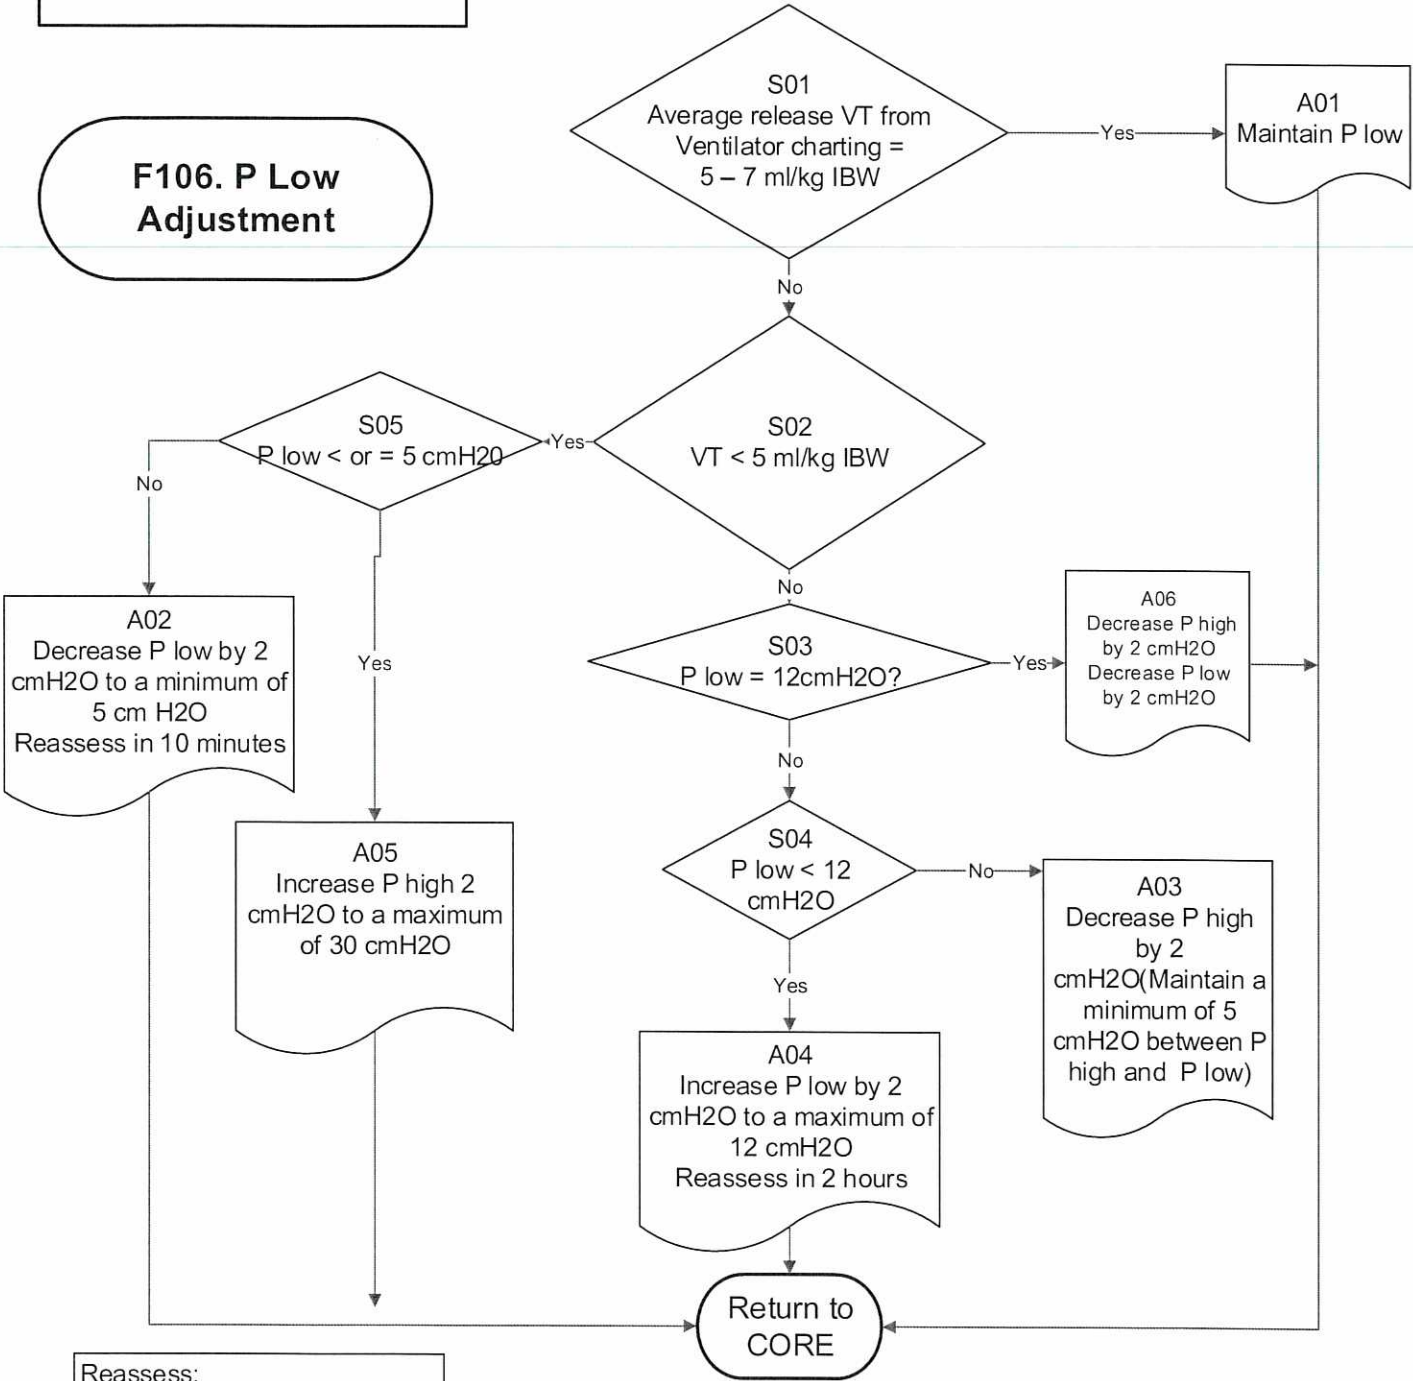

**Reassess:**  
Complete a ventilator assessment in the computer. If the release tidal volume is > 7 ml/kg IBW or less than 5 ml/kg IBW. Adjust P low according to above flow diagram.  
Note:  
\*Maintain a minimum of 5 cmH2O between P high and P low

| Setting | Min    | Max     |
|---------|--------|---------|
| T high  | 3 sec  | 12 sec  |
| T low   | .5 sec | 1.8 sec |
| P high  | 5      | 30      |
| P low   | 5      | 12      |

# APRV LTV

## F107. P High and T High Titration

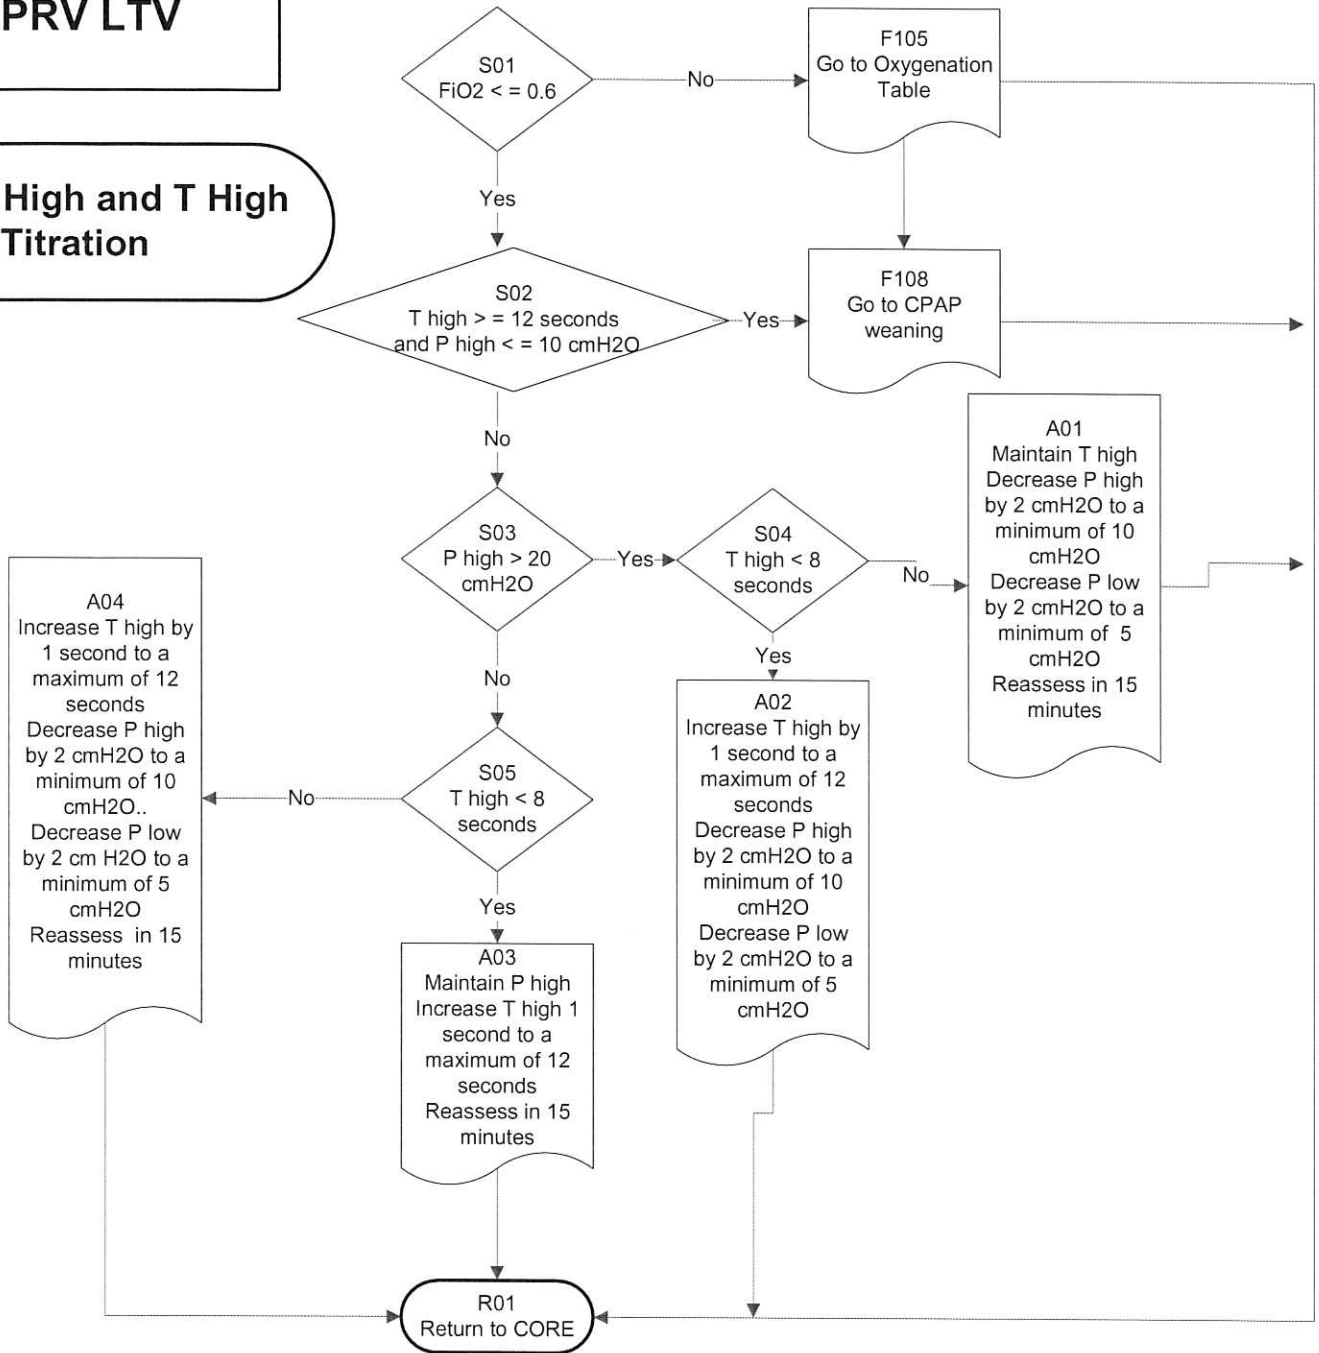

### Note:

- \* Do not increase or decrease P high by more than 4 cm H2O every 2 hours.
- \*Do not increase or decrease T high by more than 2 seconds every 2 hours.
- \*Maintain a minimum of 5 cmH2O between P high and P low.

| Setting | Min    | Max     |
|---------|--------|---------|
| T high  | 3 sec  | 12 sec  |
| T low   | .5 sec | 1.8 sec |
| P high  | 10     | 30      |
| P low   | 5      | 12      |

### Note:

If instruction from F106 P Low adjustment is to increase P low 2 cmH2O and instruction from above is to decrease P High and P low, Only decrease the P High.

# APRV LTV

## F108 Weaning Protocol to Extubation

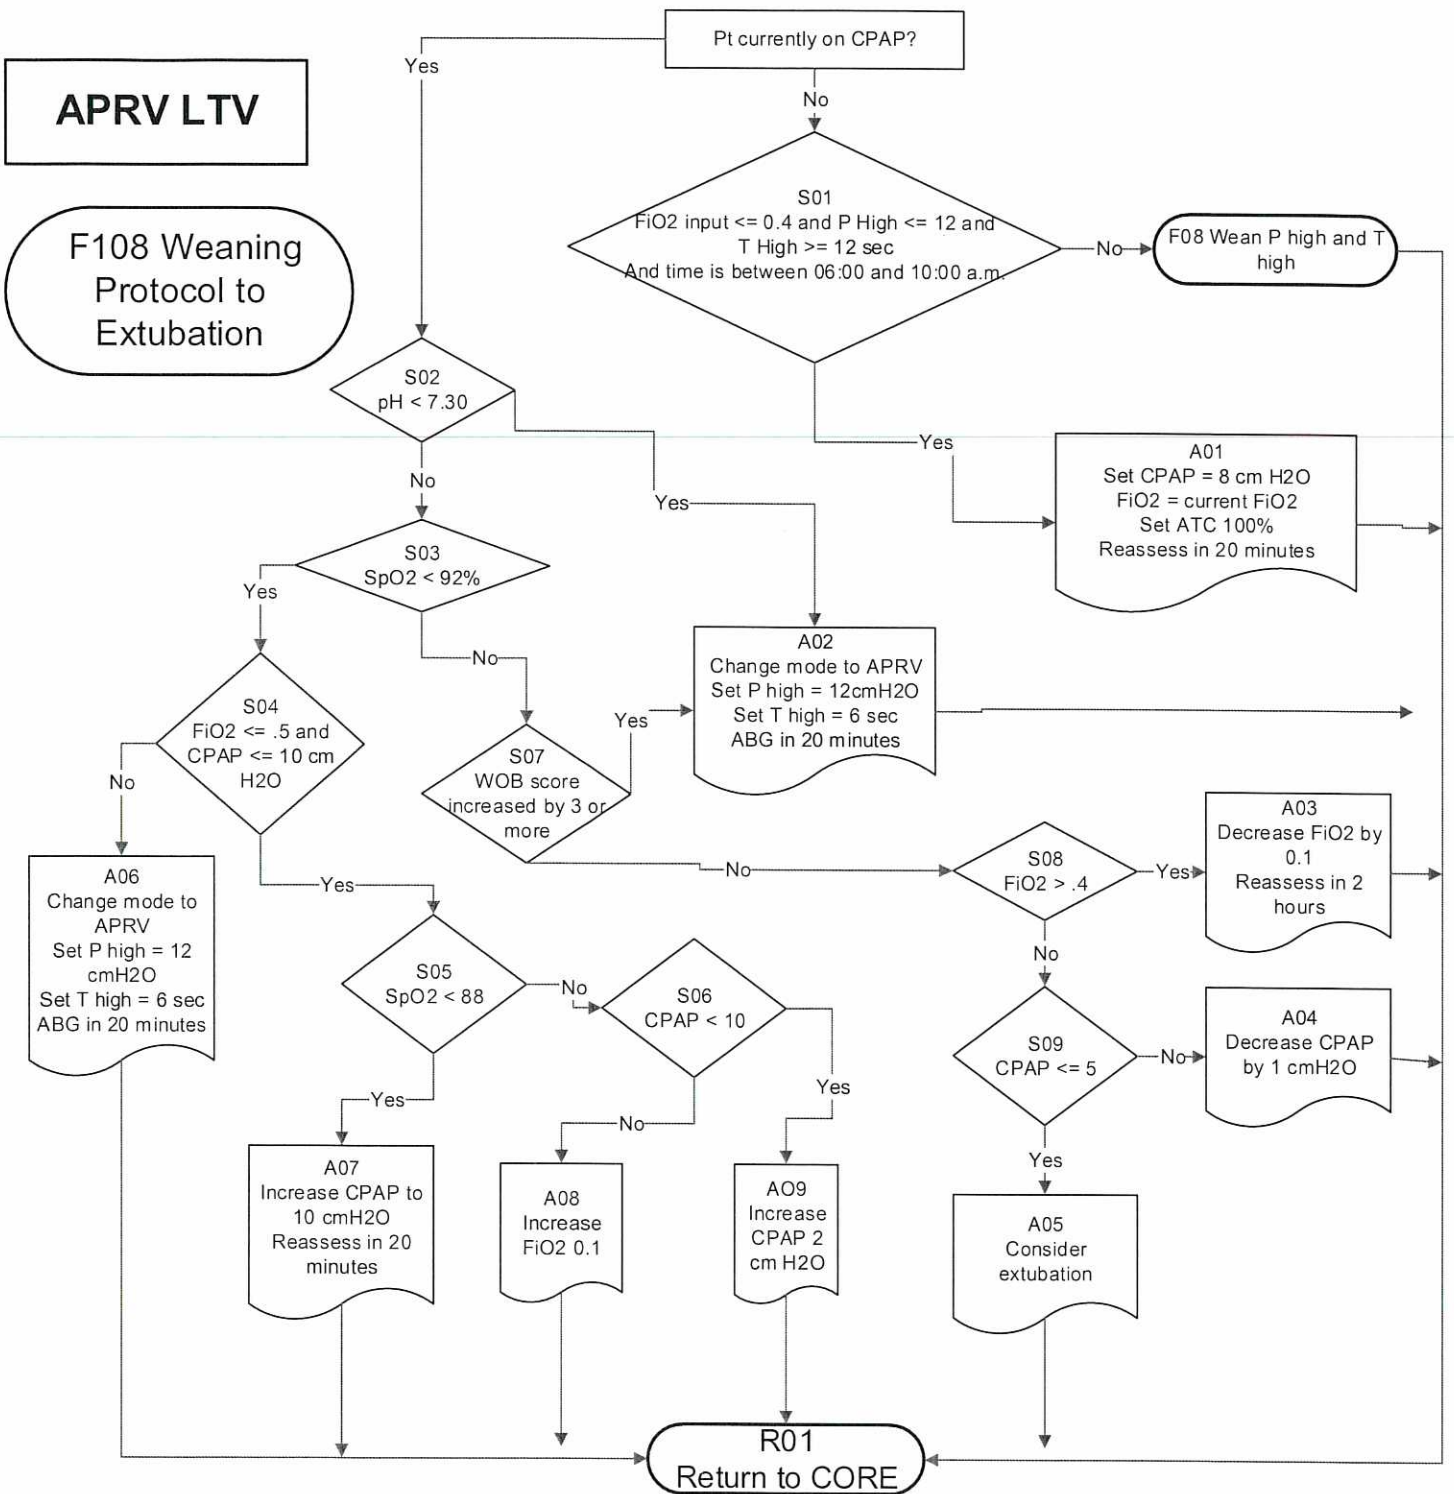

### Spontaneous Breathing Goals:

1. SpO2 > 90% or PaO2 >55
2. Average spontaneous tidal volume > 4 ml/kg IBW
3. Spontaneous VR <= 35 bpm
4. pH >= 7.30 if measured

### Reassess

1. WOB – work of breathing score
2. ETCO2
3. SpO2
4. ABG if done

### Treat correctable problems before failing patient back to APRV or reassessing

1. Anxiety, pain, delirium
2. Acute bronchospasm
3. Mucus plug
4. Excessive sedation
5. Patient position
6. Ventilator circuit problem
